# Supplementary material for: Integration of a microfluidic multicellular coculture array with machine learning analysis to predict adverse cutaneous drug reactions
Source: Royal Society of Chemistry journal article supplement (doi:10.1039/d1lc01140e), 2022-01-01
Supplement: d1lc01140e1.pdf [file d1lc01140e1.pdf]

## Integration of a microfluidic multicellular coculture array with machine learning analysis to predict adverse cutaneous drug reactions

Lor Huai Chong, Terry Ching, Hui Jia Farm, Gianluca Grenzi, Keng-Hwee Chiam, Yi-Chin Toh

### Supplementary Data

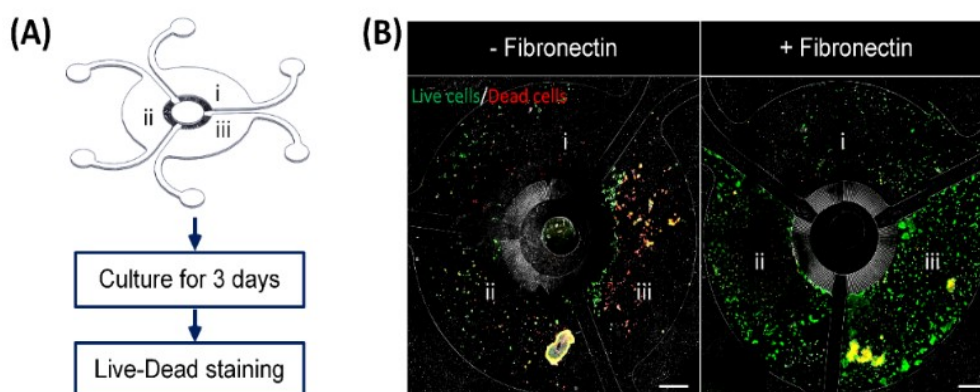

**Figure S1.** Optimization of cell seeding protocol in MCA. (A) Illustration of the process to optimize the seeding protocol using HaCaT in MCA. Cell suspensions at different cell densities including (i) 0.06 million/mL, (ii) 0.15 million/mL and (iii) 0.3 million/mL of HaCaT were seeded into different compartments of MCA respectively. (B) Fluorescent images of the overall cell seeding in MCA. Live cells are stained with green while dead cells are stained with red. The fibronectin coating (right) is found to promote the cell attachment in the device.

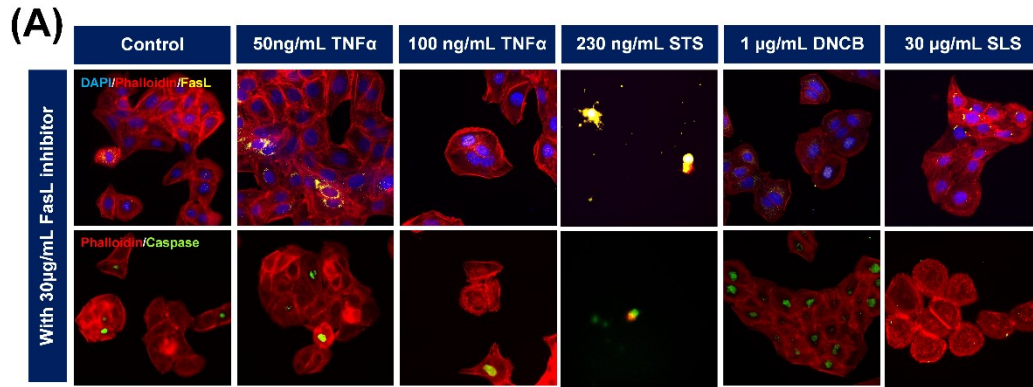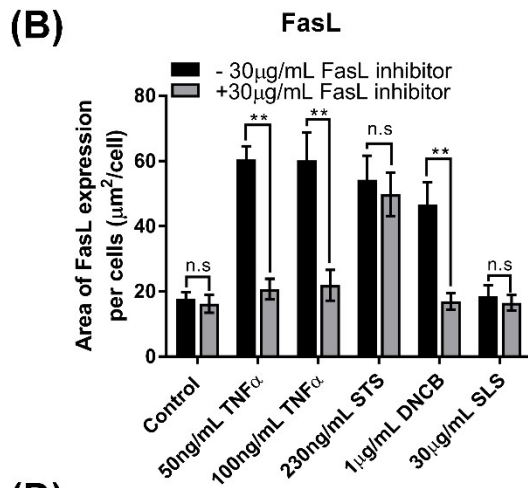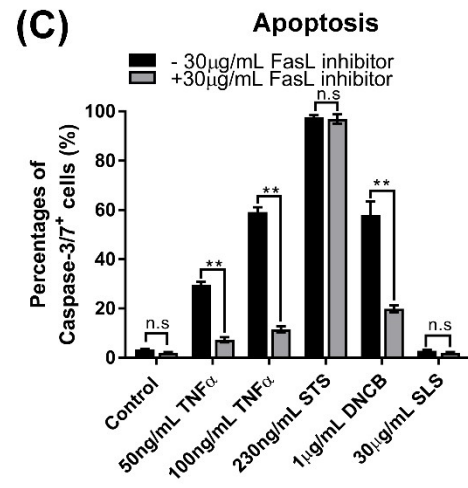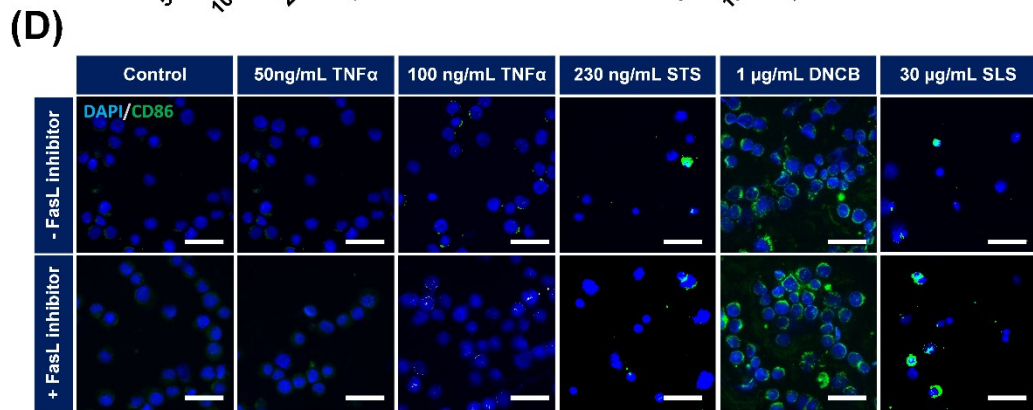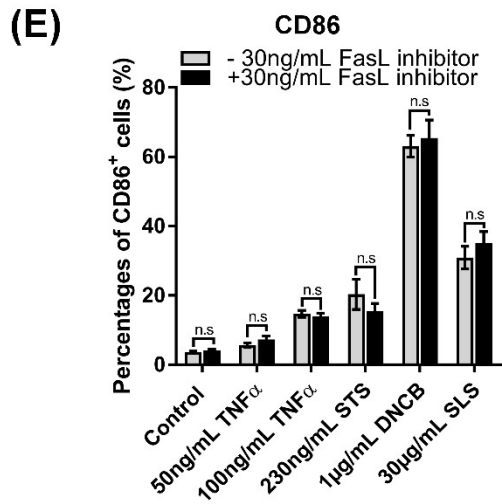

**Revised Figure S2** Effect of FasL inhibition to the cellular response of drug-treated HaCaT and U937. (A) Immunostaining of FasL (yellow), DAPI (blue) and phalloidin (red) in HaCaT with a quantification graph showing the total area of FasL expression per cell. (B) Immunostaining of caspase 3/7 (green) and phalloidin (red) in HaCaT with a quantification graph showing the percentages of caspase 3/7 positive cells after treatment. The red bars denote the HaCaT's culture without 30 ng/mL FasL inhibitor while the pink bars denote the addition of 30ng/mL FasL inhibitor. Data are average  $\pm$  SEM of 3 independent experiments. Asterisks denote the statistical significant differences (Student's t-test, \* $p < 0.05$ ; \*\* $p < 0.01$ ; n.s = no significant differences). Scale bar = 50  $\mu$ m.

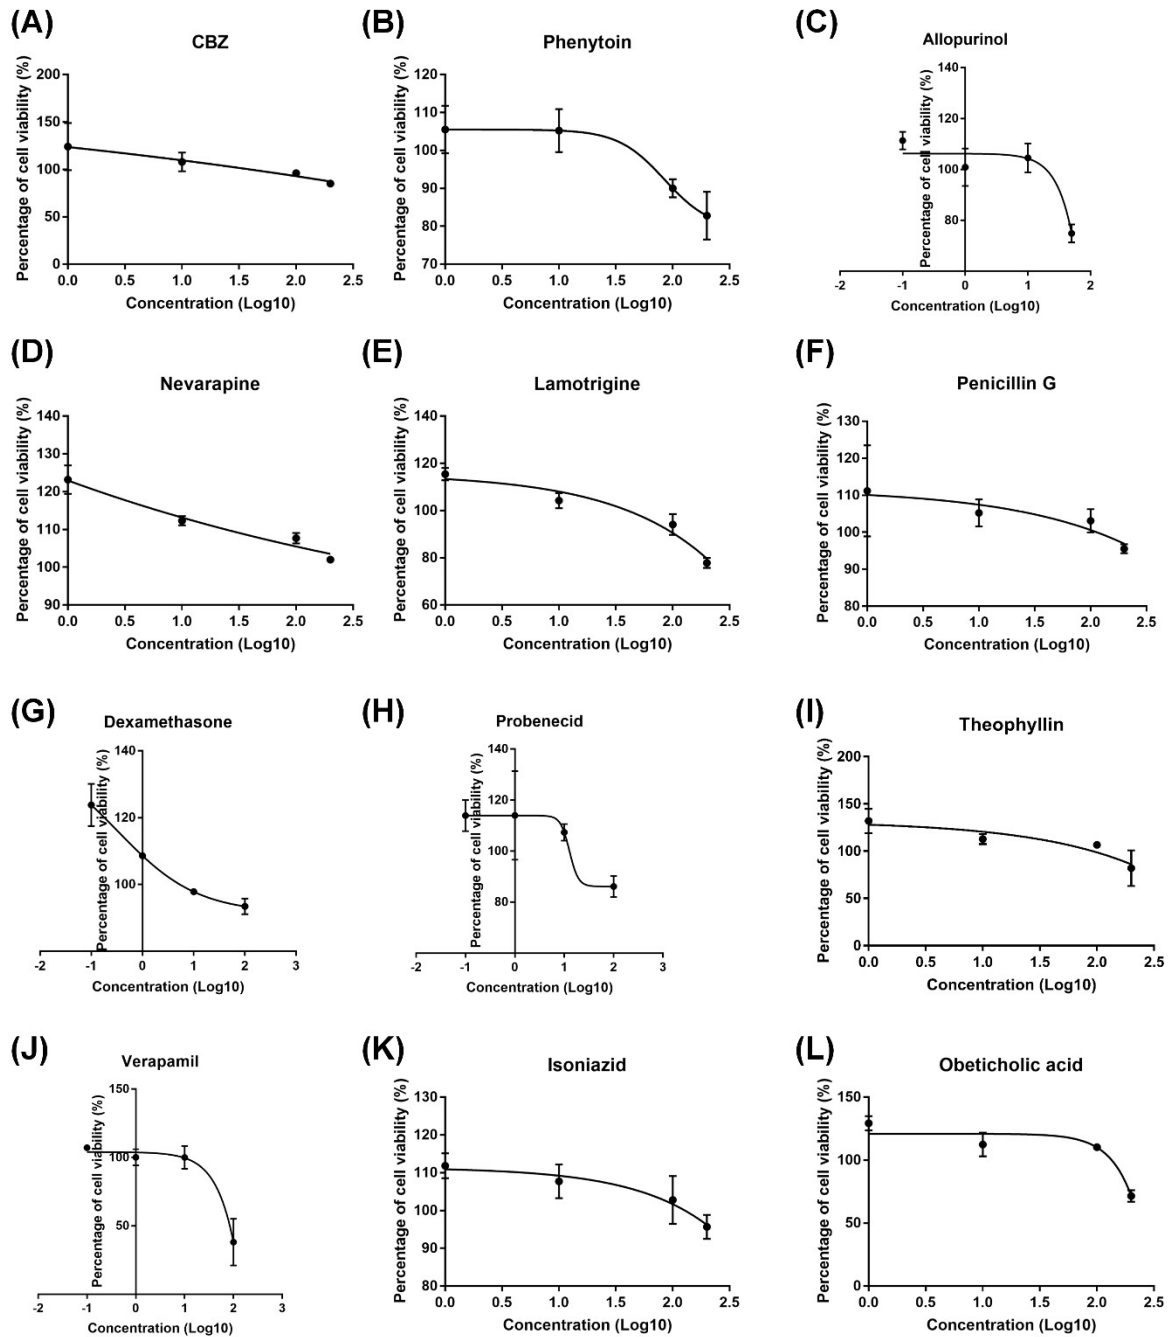

**Figure S3** Dose-response curve for the paradigm drugs, including (A) Carbamazepine (CBZ), (B) Phenytoin, (C) Allopurinol, (D) Nevirapine, (E) Lamotrigine, (F) Penicillin G, (G) Dexamethasone, (H) Probenecid, (I) Theophyllin, (J) Verapamil, (K) Isoniazid, and (L) Obeticholic acid. Data are average  $\pm$  SEM of 3 independent experiments.

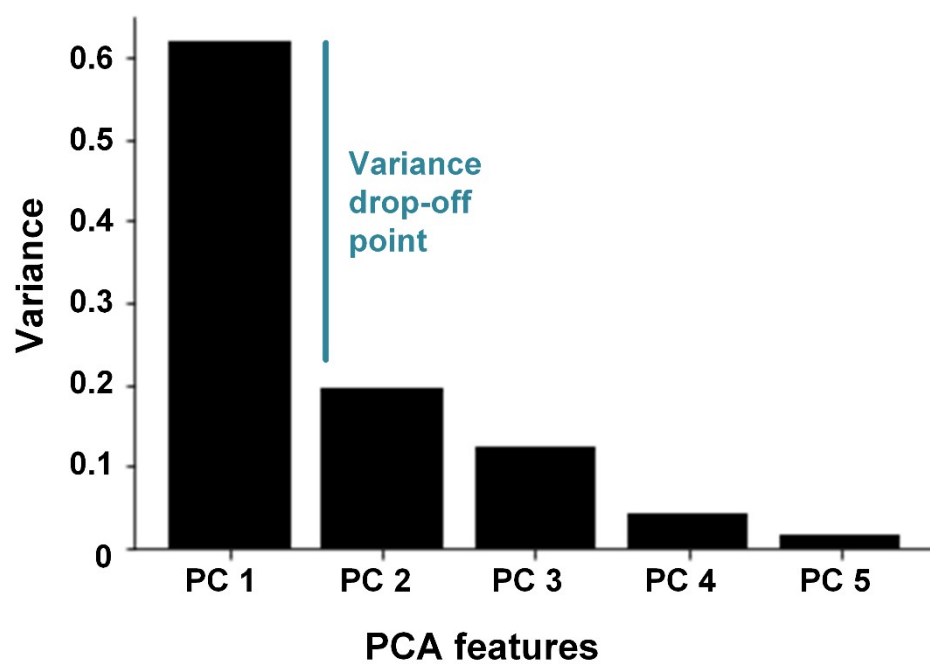

**Revised Figure S4** Screen plot showing variance drop-off after the first principal component (PC1).

| <b>Drugs</b>                                   | <b>Drug treatment in bulk culture and MCA</b> |
|------------------------------------------------|-----------------------------------------------|
| Tumor necrosis factor $\alpha$ (TNF $\alpha$ ) | 50 ng/mL and 100 ng/mL                        |
| 2,4-dinitrochlorobenzene (DNCB)                | 1 $\mu$ g/mL                                  |
| Sodium lauryl sulphate (SLS)                   | 30 $\mu$ g/mL                                 |
| Staurosporine (STS)                            | 230 ng/mL                                     |

**Table S1** Summary of the drug concentrations for FasL mediated apoptosis assay validation.

| Drugs                  | Stock concentration<br>(mM) | IC <sub>25</sub> -Heparg-<br>Hepatocytes Spheroid<br>( $\mu$ M) | Drug treatment in<br>MCA ( $\mu$ M) |
|------------------------|-----------------------------|-----------------------------------------------------------------|-------------------------------------|
| Carbamazepine<br>(CBZ) | 100                         | n.d.                                                            | 100                                 |
| Phenytoin (PHT)        | 100                         | 200                                                             | 100                                 |
| Allopurinol            | 20                          | 41.5                                                            | 20                                  |
| Nevirapine             | 80                          | n.d                                                             | 80                                  |
| Lamotrigine            | 40                          | n.d                                                             | 40                                  |
| Penicillin G           | 200                         | n.d                                                             | 200                                 |
| Verapamil              | 20                          | 76.87                                                           | 20                                  |
| Theophyllin            | 20                          | n.d                                                             | 20                                  |
| Isoniazid              | 100                         | n.d                                                             | 100                                 |
| Probenecid             | 100                         | 100                                                             | 100                                 |
| Dexamethasone          | 100                         | 100                                                             | 100                                 |

**Table S2.** 11 drugs with FDA classification on adverse cutaneous reactions were used in a pilot screen to create a data set to train the SVM classification algorithm. Table shows a summary of the drug stock concentrations, drug concentrations causing 25% of cell death (IC<sub>25</sub>) in HHS after 48 hours, and drug concentration administered to the MCA during pilot drug screen. n.d. indicates not determined.

| Cell Types                          | Markers    | Primary Antibodies                                                      | Secondary Antibodies                                                               |
|-------------------------------------|------------|-------------------------------------------------------------------------|------------------------------------------------------------------------------------|
| HHS                                 | CYP3A4     | rabbit anti-CYP3A4(1:100)<br>(Abcam, Cambridge, UK)                     | Alexa Fluor® 555 donkey anti-rabbit IgG (1:1000)<br>(Life Technologies, Singapore) |
| U937                                | CD86+      | Rabbit anti-CD86 antibody<br>(Abcam, Cambridge, UK)(1:100)              | Goat anti rabbit IgG (Alexa Fluor® 488) (1:1000)<br>(Life Technologies, Singapore) |
|                                     | DAPI       |                                                                         | 4,6-diamidino-2-phenylindole<br>(1:1000)<br>(Life Technologies, Singapore)         |
| Hacat/human<br>dermal<br>fibroblast | FasL       | Rabbit Anti-Fas Ligand<br>antibody<br>(1:200)<br>(Abcam, Cambridge, UK) | Alexa Fluor® 647 donkey anti-rabbit IgG (1:1000)<br>(Life Technologies, Singapore) |
|                                     | Phalloidin |                                                                         | Alexa Fluor™ 568 Phalloidin<br>(Life Technologies, Singapore)                      |
|                                     | DAPI       |                                                                         | 4,6-diamidino-2-phenylindole<br>(1:1000)<br>(Life Technologies, Singapore)         |

**Table S3.** List of primary and secondary antibodies used in this study.
